# Supplementary material for: Mycobiomes of two distinct clades of ambrosia gall midges (Diptera: Cecidomyiidae) are species-specific in larvae but similar in nutritive mycelia
Source: PubMed Central journal article supplement (PMC10782975; doi:10.1128/spectrum.02830-23), 2023-12-14
Supplement: reviewer-comments.pdf [file reviewer-comments.pdf]

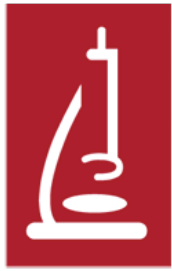

AMERICAN  
SOCIETY FOR  
MICROBIOLOGY

# Microbiology Spectrum

## **Mycobiomes of two distinct clades of ambrosia gall midges (Diptera: Cecidomyiidae) are species-specific in larvae but similar in nutritive mycelia**

Petr Pyszko, Hana Šigutová, Miroslav Kolařík, Martin Kostovčík, Jan Ševčík, Martin Šigut, Denisa Hařovská, and Pavel Drozd

*Corresponding Author(s): Petr Pyszko, Ostravska univerzita*

---

### **Review Timeline:**

|                     |                  |
|---------------------|------------------|
| Submission Date:    | July 11, 2023    |
| Editorial Decision: | October 16, 2023 |
| Revision Received:  | October 23, 2023 |
| Accepted:           | October 24, 2023 |

---

*Editor: Christina Cuomo*

*Reviewer(s): Disclosure of reviewer identity is with reference to reviewer comments included in decision letter(s). The following individuals involved in review of your submission have agreed to reveal their identity: Shu Benshui (Reviewer #1); Rosario Nicoletti (Reviewer #2)*

### **Transaction Report:**

(Note: With the exception of the correction of typographical or spelling errors that could be a source of ambiguity, letters and reports are not edited. The original formatting of letters and referee reports may not be reflected in this compilation.)

**DOI: <https://doi.org/10.1128/spectrum.02830-23>**

October 16, 2023

Dr. Petr Pyszko  
Ostravska univerzita  
Ostrava  
Czech Republic

Re: Spectrum02830-23 (Mycobiomes of two distinct clades of ambrosia gall midges (Diptera: Cecidomyiidae) are species-specific in larvae but similar in nutritive mycelia)

Dear Dr. Petr Pyszko:

Thank you for submitting your manuscript to Microbiology Spectrum. Two reviewers have provided feedback that I would like you to address in a revision. Please also ensure you have added a Data accessibility paragraph (<https://journals.asm.org/open-data-policy>) that includes accessions for your sequence data.

When submitting the revised version of your paper, please provide (1) point-by-point responses to the issues raised by the reviewers as file type "Response to Reviewers," not in your cover letter, and (2) a PDF file that indicates the changes from the original submission (by highlighting or underlining the changes) as file type "Marked Up Manuscript - For Review Only". Please use this link to submit your revised manuscript - we strongly recommend that you submit your paper within the next 60 days or reach out to me. Detailed instructions on submitting your revised paper are below.

Link Not Available

Below you will find instructions from the Microbiology Spectrum editorial office and comments generated during the review.

ASM policy requires that data be available to the public upon online posting of the article, so please verify all links to sequence records, if present, and make sure that each number retrieves the full record of the data. If a new accession number is not linked or a link is broken, provide production staff with the correct URL for the record. If the accession numbers for new data are not publicly accessible before the expected online posting of the article, publication of your article may be delayed; please contact the ASM production staff immediately with the expected release date.

The ASM Journals program strives for constant improvement in our submission and publication process. Please tell us how we can improve your experience by taking this quick [Author Survey](#).

Sincerely,

Christina Cuomo

Editor, Microbiology Spectrum

Journals Department  
American Society for Microbiology  
1752 N St., NW  
Washington, DC 20036  
E-mail: [spectrum@asmusa.org](mailto:spectrum@asmusa.org)

Reviewer comments:

Reviewer #1 (Comments for the Author):

The authors investigated a complete characterization of the mycobiomes of the whole system as we profiled gall surfaces, nutritive mycelia, and larvae. The methods used in this study were relatively reasonable, and the results displayed supported the conclusions. However, some comments existed and showed as follows:

1. English is modest. Therefore, the authors need to improve their writing style. In addition, the whole manuscript needs to be checked by native English speakers.

2. The gall surfaces, gall interiors, and larvae should be displayed as a figure.
3. The raw data obtained by sequencing should be submitted to the public repository.
4. Why the authors used ITS3 and ITS4 primers to amplify the ITS2 rDNA?
5. The Figure 5 should be revised, the horizontal coordinate is chaotic.

Reviewer #2 (Comments for the Author):

This manuscript reports original data on fungi associated with a few species of cecidomyid gall midges. Although the authors could not demonstrate a clear symbiotic role by any of the identified species, their findings represent a valuable contribution for improving our understanding of this unique biological association. The manuscript is well written and offers an exhaustive introductory overview of the current knowledge on the subject. I only observe that the discussion section should be revised by removing some uncircumstantial considerations. Particularly, concerning text at lines 394-398 I remark that *Fusarium* spp. are very diverse in their occurrence and ecological interactions; in fact, they are often mentioned as entomopathogens, and their mycotoxins could have a noxious effect on the larvae rather than protecting them from bacterial infections. Some statements in this section also require revision. At line 366, it is incorrect that *Radulidium subulatum* had been previously identified as *Macrophoma* sp.; indeed, *Macrophoma* is an old name for *Botryosphaeria dothidea*, and it is very likely that fungi identified with this name in the old papers corresponded to the latter species. At line 368-369 it is incorrect that *Cercospora* (Dothideomycetes) is similar to *Sarocladium* (Sordariomycetes). Finally, at lines 370, 'plant' should be deleted; in fact, the saprobic aptitude is not intended to be exerted on living organisms, and ref. 89 generically qualifies *Myrmecridium* as 'saprobes'.

Staff Comments:

### Preparing Revision Guidelines

To submit your modified manuscript, log onto the eJP submission site at <https://spectrum.msubmit.net/cgi-bin/main.plex>. Go to Author Tasks and click the appropriate manuscript title to begin the revision process. The information that you entered when you first submitted the paper will be displayed. Please update the information as necessary. Here are a few examples of required updates that authors must address:

- Point-by-point responses to the issues raised by the reviewers in a file named "Response to Reviewers," NOT IN YOUR COVER LETTER.
- Upload a compare copy of the manuscript (without figures) as a "Marked-Up Manuscript" file.
- Each figure must be uploaded as a separate file, and any multipanel figures must be assembled into one file.
- Manuscript: A .DOC version of the revised manuscript
- Figures: Editable, high-resolution, individual figure files are required at revision, TIFF or EPS files are preferred

For complete guidelines on revision requirements, please see the journal Submission and Review Process requirements at <https://journals.asm.org/journal/Spectrum/submission-review-process>. **Submissions of a paper that does not conform to Microbiology Spectrum guidelines will delay acceptance of your manuscript. "**

Please return the manuscript within 60 days; if you cannot complete the modification within this time period, please contact me. If you do not wish to modify the manuscript and prefer to submit it to another journal, please notify me of your decision immediately so that the manuscript may be formally withdrawn from consideration by Microbiology Spectrum.

If your manuscript is accepted for publication, you will be contacted separately about payment when the proofs are issued; please follow the instructions in that e-mail. Arrangements for payment must be made before your article is published. For a complete list of **Publication Fees**, including supplemental material costs, please visit our [website](#).

Corresponding authors may [join or renew ASM membership](#) to obtain discounts on publication fees. Need to upgrade your membership level? Please contact Customer Service at [Service@asmusa.org](mailto:Service@asmusa.org).

Thank you for submitting your paper to Microbiology Spectrum.

23 October 2023  
Dr Christina Cuomo  
Editor, Microbiology Spectrum

Dear Dr Cuomo,

Thank you for considering our manuscript entitled “**Mycobiomes of two distinct clades of ambrosia gall midges (Diptera: Cecidomyiidae) are species-specific in larvae but similar in nutritive mycelia**” (02830-23) for publication. I, along with my co-authors, would like to re-submit its revised version.

We received two very positive reviews on our manuscript. We carefully checked the manuscript and made appropriate changes in accordance with the reviewers’ suggestions. The manuscript has also been checked by the native English speaker (in accordance with the reviewer 1 comment). We believe that the comments of both reviewers have improved the quality of our manuscript. Our responses are attached herewith.

We look forward to hearing from you regarding our submission. We would be glad to respond to any further questions and comments that you may have.

Sincerely,

Hana Šigutová

#### **Reviewer #1 (Comments for the Author):**

English is modest. Therefore, the authors need to improve their writing style. In addition, the whole manuscript needs to be checked by native English speakers.

*## We have taken your comment into consideration and made several improvements to the language. Specifically, we have addressed typographical errors, included missing articles, improved sentence punctuation, and replaced inappropriate prepositions. We believe that these changes have enhanced the overall quality of the text. Moreover, the manuscript has been re-checked by native English speaker.*

The gall surfaces, gall interiors, and larvae should be displayed as a figure.

*## We are not sure we understand this comment, but the differences in microbial communities among individual gall parts are displayed in Figures 1–5.*

The raw data obtained by sequencing should be submitted to the public repository.

*## Raw data are deposited in a public repository, the information is provided in the manuscript (now newly as a Data availability statement, lines 411–414). We also added the direct website link.*

Why the authors used ITS3 and ITS4 primers to amplify the ITS2 rDNA?

*## These are standard primers used to amplify ITS2 rDNA region. Based on our previous experience, by combination of these primers it is possible to obtain the highest possible coverage (e.g., <https://www.nature.com/articles/s41598-022-19855-5>; <https://journals.asm.org/doi/full/10.1128/spectrum.03160-22>).*

The Figure 5 should be revised, the horizontal coordinate is chaotic.

*## Thank you for this comment. We altered the colors and patterns in the figure, and we added a better caption of axes. We believe that the whole figure looks less chaotic now.*

## **Reviewer #2 (Comments for the Author):**

This manuscript reports original data on fungi associated with a few species of cecidomyid gall midges. Although the authors could not demonstrate a clear symbiotic role by any of the identified species, their findings represent a valuable contribution for improving our understanding of this unique biological association. The manuscript is well written and offers an exhaustive introductory overview of the current knowledge on the subject. I only observe that the discussion section should be revised by removing some uncircumstantial considerations. Particularly, concerning text at lines 394-398 I remark that *Fusarium* spp. are very diverse in their occurrence and ecological interactions; in fact, they are often mentioned as entomopathogens, and their mycotoxins could have a noxious effect on the larvae rather than protecting them from bacterial infections.

*## Thank you for this comment; we incorporated this important information to the manuscript (lines 253–255).*

Some statements in this section also require revision. At line 366, it is incorrect that *Radulidium subulatum* had been previously identified as *Macrophoma* sp.; indeed, *Macrophoma* is an old name for *Botryosphaeria dothidea*, and it is very likely that fungi identified with this name in the old papers corresponded to the latter species.

*## Thank you for this comment, corrected (line 220).*

At line 368-369 it is incorrect that *Cercospora* (Dothideomycetes) is similar to *Sarocladium* (Sordariomycetes).

*## Thank you for this comment; we agree. This statement was misinterpreted due to incorrect translation – we corrected it (line 223).*

Finally, at lines 370, 'plant' should be deleted; in fact, the saprobic aptitude is not intended to be exerted on living organisms, and ref. 89 generically qualifies *Myrmecridium* as 'saprobes'.

*## Deleted (now line 225).*

Re: Spectrum02830-23R1 (Mycobiomes of two distinct clades of ambrosia gall midges (Diptera: Cecidomyiidae) are species-specific in larvae but similar in nutritive mycelia)

Dear Dr. Petr Pyszko:

Your manuscript has been accepted, and I am forwarding it to the ASM production staff for publication. Your paper will first be checked to make sure all elements meet the technical requirements. ASM staff will contact you if anything needs to be revised before copyediting and production can begin. Otherwise, you will be notified when your proofs are ready to be viewed.

**Data Availability:** ASM policy requires that data be available to the public upon online posting of the article, so please verify all links to sequence records, if present, and make sure that each number retrieves the full record of the data. If a new accession number is not linked or a link is broken, provide production staff with the correct URL for the record. If the accession numbers for new data are not publicly accessible before the expected online posting of the article, publication may be delayed; please contact ASM production staff immediately with the expected release date.

**Publication Fees:** For information on publication fees and which article types have charges, please visit our [website](#). We have partnered with Copyright Clearance Center (CCC) to collect author charges. If fees apply to your paper, you will receive a message from no-reply@copyright.com with further instructions. For questions related to paying charges through RightsLink, please contact CCC at ASM\_Support@copyright.com or toll free at +1-877-622-5543. CCC makes every attempt to respond to all emails within 24 hours.

**ASM Membership:** Corresponding authors may [join or renew ASM membership](#) to obtain discounts on publication fees. Need to upgrade your membership level? Please contact Customer Service at Service@asmusa.org.

**PubMed Central:** ASM deposits all Spectrum articles in PubMed Central and international PubMed Central-like repositories immediately after publication. Thus, your article is automatically in compliance with the NIH access mandate. If your work was supported by a funding agency that has public access requirements like those of the NIH (e.g., the Wellcome Trust), you may post your article in a similar public access site, but we ask that you specify that the release date be no earlier than the date of publication on the Spectrum website.

**Embargo Policy:** A press release may be issued as soon as the manuscript is posted on the [Spectrum Latest Articles webpage](#). The corresponding author will receive an email with the subject line "ASM Journals Author Services Notification" when the article is available online.

The ASM Journals program strives for constant improvement in our submission and publication process. Please tell us how we can improve your experience by taking this quick [Author Survey](#).

Thank you for submitting your paper to Spectrum.

Sincerely,  
Christina Cuomo  
Editor  
Microbiology Spectrum
